# Supplementary material for: Single molecule magnet behaviour in a {Dy4P2} octahedron
Source: Royal Society of Chemistry journal article supplement (doi:10.1039/c5dt01786f), 2015-01-01
Supplement: c5dt01786f1.pdf [file c5dt01786f1.pdf]

## Supporting Information

### **Single Molecule Magnet behaviour in a {Dy<sub>4</sub>P<sub>2</sub>} Octahedron**

Karzan H. Zangana, Eufemio Moreno Pineda<sup>§</sup> and Richard E. P. Winpenny\*

*School of Chemistry and Photon Science Institute, The University of Manchester, Oxford road, Manchester M13 9PL, UK.  
Fax: 44 – 161 – 275 – 4606; E-mail: [richard.winpenny@manchester.ac.uk](mailto:richard.winpenny@manchester.ac.uk)*

<sup>§</sup> *Current address: Institute of Nanotechnology, Karlsruhe Institute of Technology, D-76344, Eggenstein-Leopoldshafen, Germany.*

#### **Experimental Details**

All reagents, metal salts and ligands were used as obtained from Aldrich. Analytical data were obtained by the microanalytical service of the University of Manchester, [Co<sub>3</sub>(μ<sub>3</sub>-O)(O<sub>2</sub>C'Bu)<sub>6</sub>(py)<sub>3</sub>]•O<sub>2</sub>C'Bu was prepared as reported.<sup>1</sup>

#### **Preparation of compounds 1 and 2**

Compound **1** was synthesised by reacting a mixture of gadolinium nitrate Gd(NO<sub>3</sub>)<sub>3</sub>•6H<sub>2</sub>O (0.13 g, 0.30 mmol), [Co<sub>3</sub>(μ<sub>3</sub>-O)(O<sub>2</sub>C'Bu)<sub>6</sub>(py)<sub>3</sub>]•O<sub>2</sub>C'Bu (1g, 0.88mmol), *tert*-butyl phosphonic acid (H<sub>2</sub>O<sub>3</sub>P'Bu) (0.07g, 0.507 mmol) and pyridine (C<sub>5</sub>H<sub>5</sub>N) (0.5mL, 6.20mmol) in acetonitrile (CH<sub>3</sub>CN) (15 ml) for 7 hrs to form a brown solution. The solution was filtered and then allowed to stand untouched at room temperature for two weeks. Light brown colour crystals of the compound **1** suitable for X-ray were collected. Yield 65 mg (25%), based on Gd(NO<sub>3</sub>)<sub>3</sub>•6H<sub>2</sub>O. EA for C<sub>122</sub>H<sub>202</sub>Co<sub>6</sub>Gd<sub>4</sub>N<sub>14</sub>O<sub>60</sub>P<sub>2</sub>, found (calc); C 37.85 (37.87); H 5.20 (5.26); N 5.04 (5.07); Gd. 16.22 (16.25); P 1.55 (1.60); Co 9.10 (9.14).

A parallel procedure to that used for synthesis of compound **1** was used for compound **2**, using Dy(NO<sub>3</sub>)<sub>3</sub>•5H<sub>2</sub>O (0.30 mmol) in place of Gd(NO<sub>3</sub>)<sub>3</sub>•6H<sub>2</sub>O. Yield 50 mg (20%), based on Dy(NO<sub>3</sub>)<sub>3</sub>•5H<sub>2</sub>O. EA for C<sub>122</sub>H<sub>202</sub>Co<sub>6</sub>Dy<sub>4</sub>N<sub>14</sub>O<sub>60</sub>P<sub>2</sub>, found (calc); C 37.70 (37.66); H 5.20 (5.23); N 5.01 (5.04); Dy 16.65 (16.71); P 1.57 (1.59); Co 9.06 (9.09).

#### **Crystallography**

The data were collected on Agilent SuperNova CCD diffractometer with MoK<sub>α</sub> radiation (λ = 0.71073 Å). The structures were solved by direct methods and refined on *F2* using SHELXTL. CCDC 1051263 and 1051264 contain the supplementary crystallographic data for this paper. These data can be obtained free of charge via

---

<sup>1</sup> G. Aromi, A. S. Batsanov, P. Christian, M. Helliwell, A. Parkin, S. Parsons, A. A. Smith, G. A. Timco, R. E. P. Winpenny, *Chem. Eur. J.*, 2003, **9**, 5142.

www.ccdc.cam.ac.uk/conts/retrieving.html (or from Cambridge Crystallographic Data Centre, 12 Union Road, Cambridge CB21EZ, UK; fax: (+44)1223-336-033; or deposit@ccdc.cam.ac.uk).

Crystal data for **1** [C<sub>122</sub>H<sub>202</sub>Co<sub>6</sub>Gd<sub>4</sub>N<sub>14</sub>O<sub>60</sub>P<sub>2</sub>]:  $M_r = 3869.48$ , monoclinic,  $P2_1/n$ ,  $T = 128(4)$  K,  $a = 11.7554(2)$ ,  $b = 19.4689(4)$ ,  $c = 36.4118(7)$  Å,  $\alpha / ^\circ = 90$ ,  $\beta / ^\circ = 97.9131(17)$ ,  $\gamma / ^\circ = 90$ ,  $V = 8254.0(3)$  Å<sup>3</sup>,  $Z = 2$ ,  $\rho = 1.557$  g cm<sup>-3</sup>, total data = 64303, independent reflections 16879 ( $R_{int} = 0.0631$ ),  $\mu = 2.274$  mm<sup>-1</sup>, 1053 parameters,  $R_1 = 0.0479$  for  $I \geq 2\sigma(I)$  and  $wR_2 = 0.0687$  CCDC 1051264.

Crystal data for **2** [C<sub>106</sub>H<sub>196</sub>Co<sub>6</sub>Gd<sub>4</sub>N<sub>12</sub>O<sub>60</sub>P<sub>2</sub>]:  $M_r = 3890.48$ , monoclinic,  $P2_1/n$ ,  $T = 150.02(10)$  K,  $a = 11.7542(2)$ ,  $b = 19.4585(4)$ ,  $c = 36.4590(7)$  Å,  $\alpha / ^\circ = 90$ ,  $\beta / ^\circ = 97.9842(19)$ ,  $\gamma / ^\circ = 90$ ,  $V = 8258.0(3)$  Å<sup>3</sup>,  $Z = 2$ ,  $\rho = 1.565$  g cm<sup>-3</sup>, total data = 41706, independent reflections 18920 ( $R_{int} = 0.0750$ ),  $\mu = 2.476$  mm<sup>-1</sup>, 1059 parameters,  $R_1 = 0.0448$  for  $I \geq 2\sigma(I)$  and  $wR_2 = 0.0900$  CCDC 1051263.

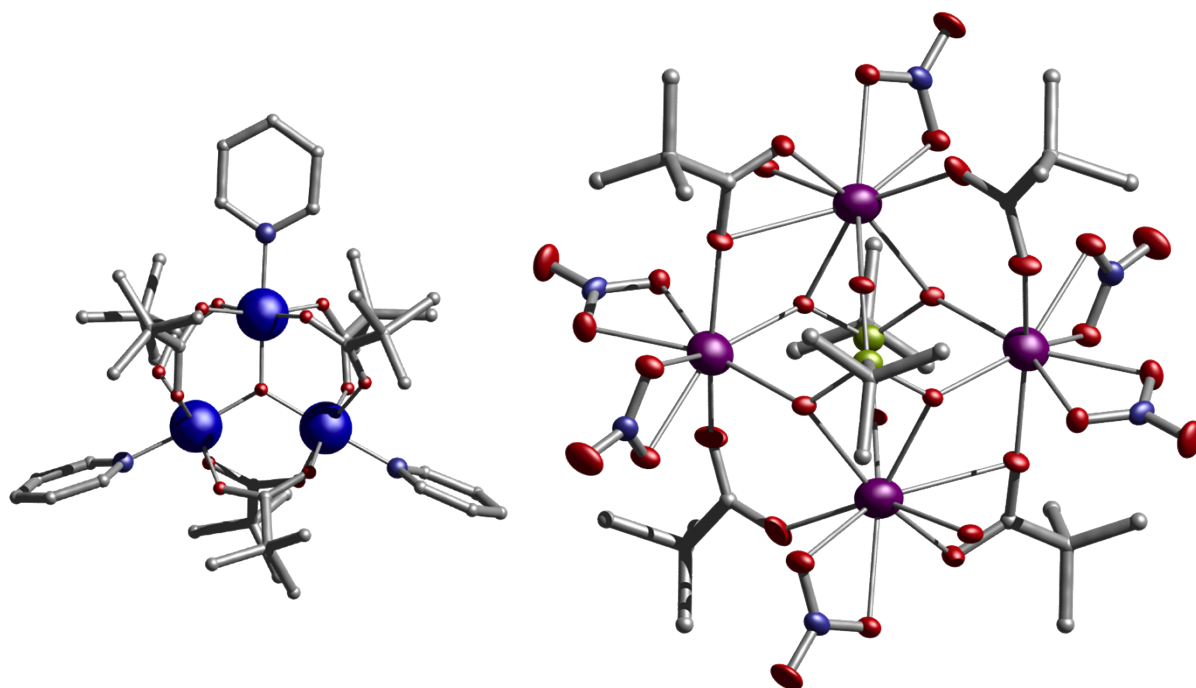

**Figure S1.** Crystal structure of **2**. Colour codes: Dy, purple; P, green; Co, blue; N, cyan; O, red; C, grey. H-atoms are omitted for clarity.

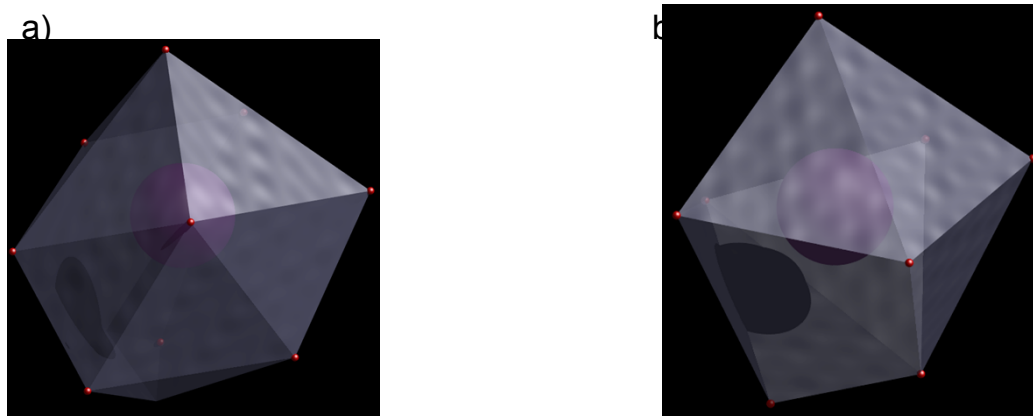

**Figure S2.** (a) and (b) are the polyhedral view of Dy1 and Dy2, respectively.

**Table S1.** CShM values for the Dy metal ion centres of **2**.

| <b>Dy1</b>    |        | <b>Dy2</b>    |        |
|---------------|--------|---------------|--------|
| Geometry      | CShM   | Geometry      | CShM   |
| <b>OP</b>     | 31.623 | <b>EP</b>     | 30.136 |
| <b>HPY</b>    | 23.144 | <b>OPY</b>    | 22.402 |
| <b>HBPY</b>   | 13.442 | <b>HBPY</b>   | 15.576 |
| <b>CU</b>     | 12.503 | <b>JTC</b>    | 14.218 |
| <b>SAPR</b>   | 4.705  | <b>JCCU</b>   | 8.029  |
| <b>TDD</b>    | 2.745  | <b>CCU</b>    | 6.926  |
| <b>JGBF</b>   | 11.410 | <b>JCSAPR</b> | 5.858  |
| <b>JETBPY</b> | 26.724 | <b>CSAPR</b>  | 4.840  |
| <b>JBTPR</b>  | 4.333  | <b>JTCTRP</b> | 4.777  |
| <b>BTPR</b>   | 3.905  | <b>TCTPR</b>  | 5.830  |
| <b>JSD</b>    | 3.575  | <b>JTDIC</b>  | 10.421 |
| <b>TT</b>     | 13.256 | <b>HH</b>     | 5.955  |
| <b>ETBPY</b>  | 24.075 | <b>MFF</b>    | 3.265  |

### **Magnetic measurements**

The magnetic properties in the temperature range 1.8 K–300 K were performed on polycrystalline samples either constrained in eicosane or powdered, using a Quantum Design MPMS-XL7 SQUID magnetometer armed with a 7 T magnet. Data were corrected for the diamagnetism of the compounds (Pascal constants) and for diamagnetic contribution of eicosane and the sample holder by measurement.

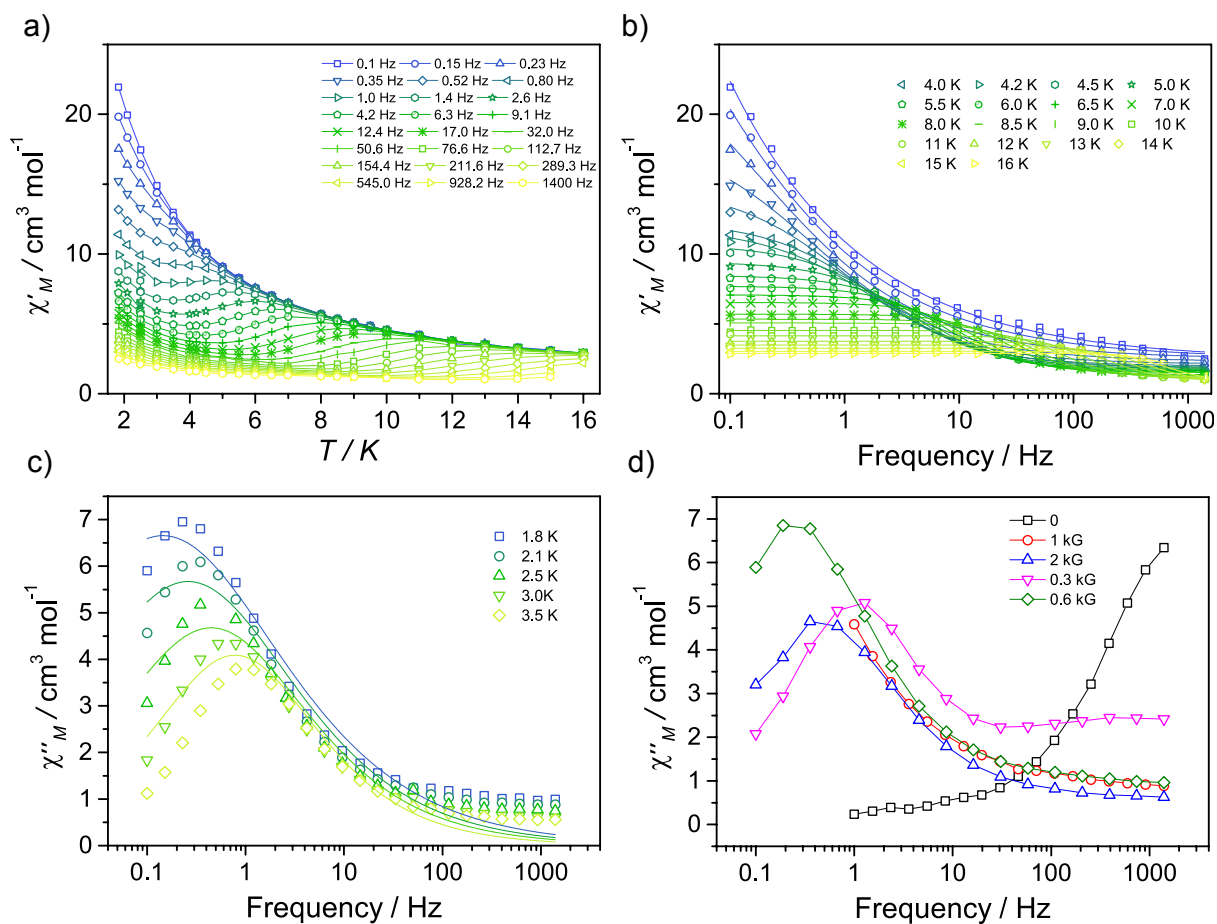

**Figure S3.** (a)  $\chi_M'(T)$ ; (b)  $\chi_M'(ν)$ ; (c)  $\chi_M''(ν)$ ; (d) and field dependence of the  $\chi_M''(ν)$  for compound 2.
